# Supplementary material for: Acarbose Accelerates Wound Healing via Akt/eNOS Signaling in db/db Mice
Source: Hindawi journal article supplement (doi:10.1155/2017/7809581), 2017-01-01
Supplement: f1 [file 7809581.f1.pdf]

## SUPPLEMENTAL MATERIAL

### METHODS

#### Identification of the mouse leptin receptor mutation

The tails of mice were used for genomic DNA extraction by standard SDS/proteinase K lysis and the phenol/chloroform extraction method [1]. Extracted genomic DNA was used as a template for PCR amplification. The PCR samples comprised 50 ng genomic DNA, 0.12  $\mu$ L rTaq (Takara, Japan) plus 10 $\times$  PCR buffer, 1  $\mu$ L MgCl<sub>2</sub> (25 mM), 0.25  $\mu$ L dNTPs (10 mM), 1.2  $\mu$ L BS (5M), 2.63  $\mu$ L dd H<sub>2</sub>O and 0.3  $\mu$ L primers (25  $\mu$ M). Target DNA was amplified in a Cyclogene Dri-Block<sup>®</sup> cyclor (Techne Cambridge Ltd., U.K.), with initial denaturation at 94 °C for 3 min followed by 35 cycles of 94 °C for 30 sec, 61°C 30 sec, and 72 °C for 30 sec and a final elongation period at 72 °C for 2 min. The PCR products were analyzed by electrophoresed on a 3% agarose gel.

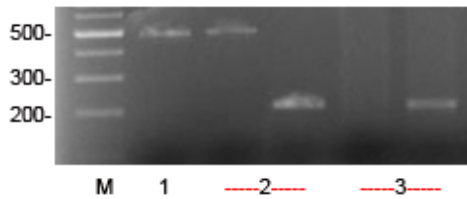

#### Supplementary FIGURE 1: Detection of leptin receptor mutation by agarose gel electrophoresis.

Three genotypes (+/+, *db*/+, *db/db*) were tested. The 481 bp PCR products were amplified from normal (+/+) mice; while the 200 bp PCR products were amplified from homozygote (*db/db*) mice; and the 481 and 200 bp PCR products were amplified from heterozygote (*db*/+) mice. M: 100 bp ladder; 1: C57BL/KsJ; 2: BKS.Cg-m/+ *Lepr*<sup>db</sup>/J *db*/+ mice; 3: BKS.Cg-m +/+ *Lepr*<sup>db</sup>/J *db/db*.

#### Supplementary TABLE 1: PCR primer sequences.

| Primer Sequences (5'→3') | Primer Type    |
|--------------------------|----------------|
| GCTGCAGAATGGACGGTTGA     | Common         |
| GCAGTGCACAGGCTCAGGAA     | Wild Reverse   |
| AGCCACTACAATCCACCCCTTG   | Mutant Reverse |

### References

- [1]. SH Oh, H Nam, JG Suh. A high resolution genetic mapping of the faded (*fe*) gene to a region between D10mit156 and D10mit193 on mouse chromosome 10. *Lab Anim Res.* 2013; 29(1): 33-38.
